# Supplementary material for: Comparison between optical and digital blur using near visual acuity
Source: PubMed Central journal article supplement (PMC7873285; doi:10.1038/s41598-021-82965-z), 2021-02-09
Supplement: 41598_2021_82965_MOESM2_ESM.pdf [file 41598_2021_82965_MOESM2_ESM.pdf]

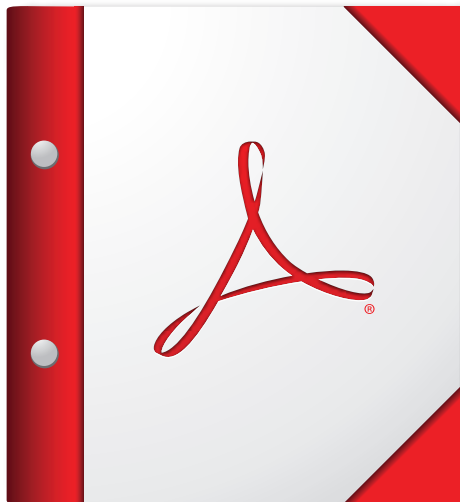

**Nejlepších výsledků dosáhnete, když toto portfolio PDF otevřete v aplikaci Acrobat X či Adobe Reader X nebo novější.**

**Opatřete si Adobe Reader nyní!**
